# Supplementary material for: Time to relapse after treatment withdrawal for different biologics used to treat plaque psoriasis
Source: PubMed Central journal article supplement — Chin Med J (Engl). 2020 Nov 19;133(24):2998–3000. doi: 10.1097/CM9.0000000000001232 (PMC7752671; doi:10.1097/cm9.0000000000001232), 2020-11-19
Supplement: cm9-133-2998-s001.pdf [file cm9-133-2998-s001.pdf]

Supplementary Table 1. The main biologic agents on market

| Drugs         | FDA approval time | CFDA approval time | Standard regimen                                                                                   | Half-life |
|---------------|-------------------|--------------------|----------------------------------------------------------------------------------------------------|-----------|
| Etanercept    | Apr.30, 2004      | Jul.23, 2012       | 50mg twice a week for the first 12 weeks, followed by 50mg weekly                                  | 3.5 days  |
| Infliximab    | Sept.27, 2006     | Aug.22, 2013       | 5 mg / kg at weeks 0, 2, and 6 and thereafter every 8 weeks                                        | 10 days   |
| Adalimumab    | Jan.22, 2008      | May.17, 2018       | 80 mg at week 0, 40 mg at week1, and 40 mg every two weeks thereafter.                             | 14 days   |
| Ustekinumab   | Sept.25, 2009     | Feb.21, 2019       | 45 mg at week 0 and 4, followed by every 12 weeks. The dosage is 90 mg for patients $\geq 100$ kg. | 21 days   |
| Secukinumab   | Jan.21, 2015      | Apr.1, 2019        | 300 mg at weeks 0, 1, 2, 3 and 4, and then 300 mg every 4 weeks.                                   | 27 days   |
| Ixekizumab    | Mar.22, 2016      | Sept.4, 2019       | 160 mg at week 0, 80 mg at 2, 4, 6, 8, 10 and then 80 mg every 4 weeks.                            | 13 days   |
| Brodalumab    | Feb.15, 2017      | Not approved yet   | 210 mg at weeks 0, 1 and 2, followed by every 2 weeks.                                             | 11 days   |
| Guselkumab    | Jul.13, 2017      | Dec.27, 2019       | 100 mg at week 0, week 4, and every 8 weeks thereafter.                                            | 18 days   |
| Tildrakizumab | Mar.21, 2018      | Not approved yet   | 100 mg at weeks 0 and 4 and then every 12 weeks.                                                   | 23 days   |
| Risankizumab  | Apr.23, 2019      | Not approved yet   | 150 mg at week 0, week 4, and every 12 weeks thereafter.                                           | 11 days   |
